# Supplementary material for: Morphology-controlled silver nanowire synthesis using a cocamidopropyl betaine-based polyol process for flexible and stretchable electronics
Source: Royal Society of Chemistry journal article supplement (doi:10.1039/d0ra03140b), 2020-01-01
Supplement: d0ra03140b1.pdf [file d0ra03140b1.pdf]

Electronic Supplementary Information (ESI)

**Morphology-controlled silver nanowires synthesis by a cocamidopropyl betaine-based polyol process for flexible and stretchable electronics**

Yuxiu Li, Yao Li, Zhengyang Fan, Hongwei Yang\*, Ximin Yuan, Chuan Wang\*

*State Key Laboratory of Advanced Technologies for Comprehensive Utilization of Platinum Metals, Kunming Institute of Precious Metals, 650106 Kunming, People's Republic of China*

**\* Correspondence:**

To whom correspondence should be addressed. E-mail: [nanolab@ipm.com.cn](mailto:nanolab@ipm.com.cn)

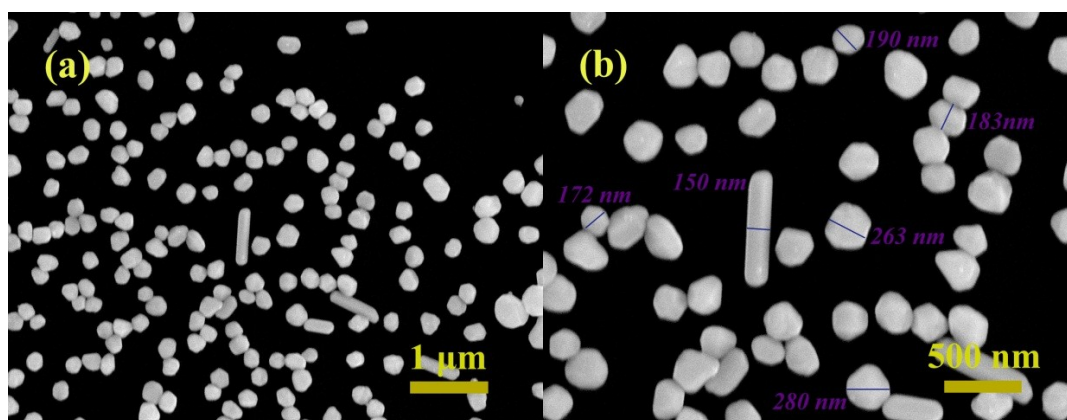

**Figure S1** FE-SEM images of sample prepared without cocamidopropyl betaine.

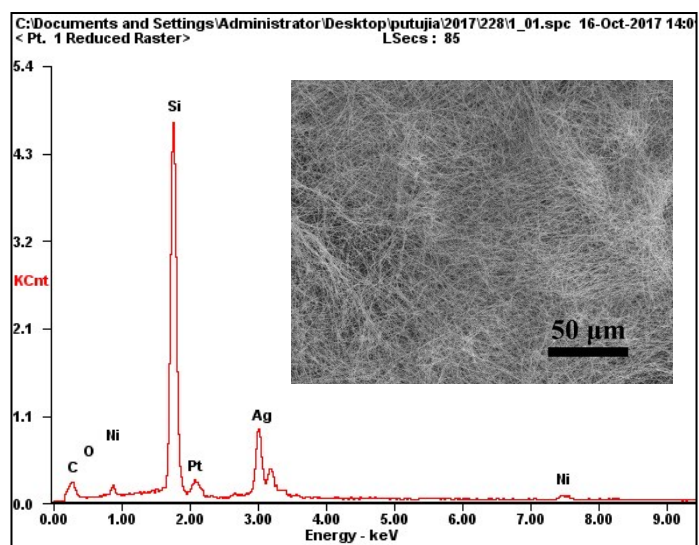

**Figure S2** EDX pattern of ultra-long AgNWs.
